# Supplementary material for: Food Combinations in Relation to the Quality of Overall Diet and Individual Meals in Japanese Adults: A Nationwide Study
Source: PubMed Central journal article supplement (PMC7071262; doi:10.3390/nu12020327), 2020-01-26
Supplement: nutrients-12-00327-s001.pdf [file nutrients-12-00327-s001.pdf]

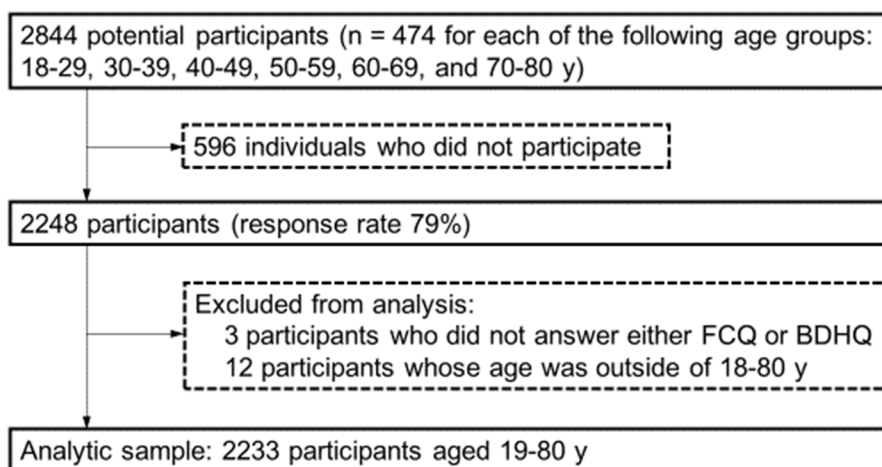

Figure S1: Flow diagram of participants included in the present analysis. BDHQ, brief diet history questionnaire; FCQ, food combination questionnaire.

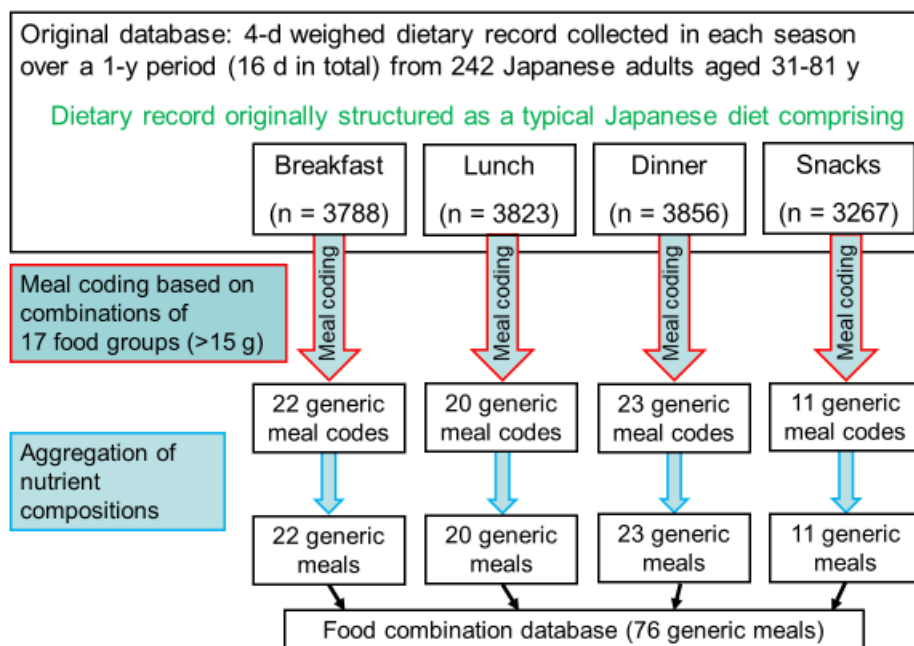

Figure S2: Flow diagram of the development process of the food combination database.

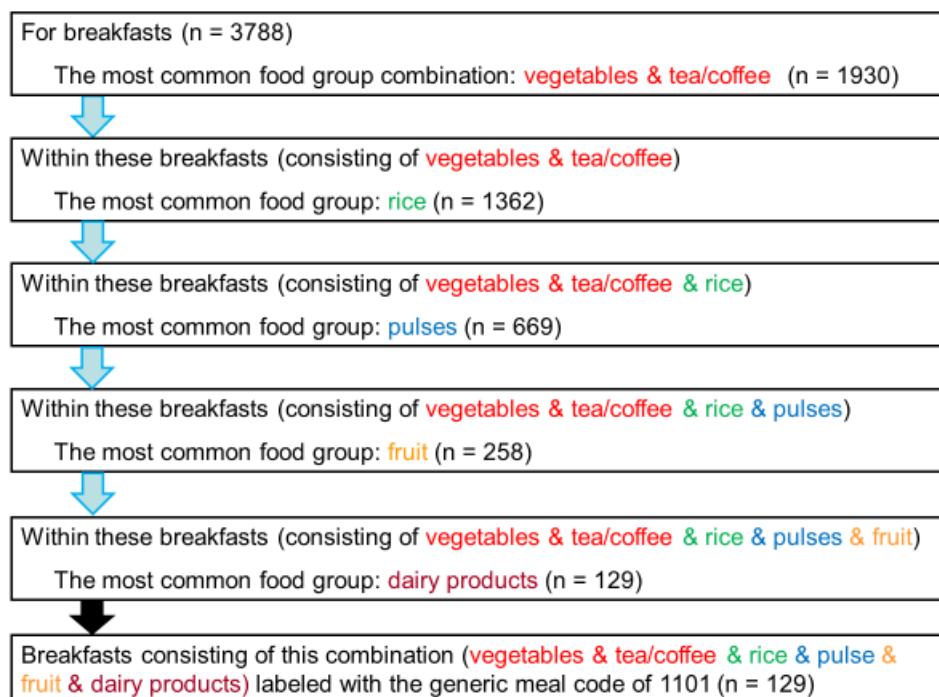

Figure S3: An example of meal coding procedure. For the breakfast meal type, the most commonly consumed combination of food groups at >15 g (an arbitrarily determined amount for consumption) was ‘vegetables and tea and coffee’ (n = 1930). Among all individual breakfasts comprising a combination of ‘vegetables and tea and coffee’, the most commonly consumed food group was ‘rice’ (n = 1362). For all individual breakfasts consisting of the ‘vegetables, tea and coffee, and rice’ combination, the most commonly consumed food group was ‘pulses’ (n = 669). For all individual breakfasts consisting of the ‘vegetables, tea and coffee, rice, and pulses’ combination, the most commonly consumed food group was ‘fruit’ (n = 258). For all individual breakfasts consisting of the ‘vegetables, tea and coffee, rice, pulses, and fruit’ combination, the most commonly consumed food group was ‘dairy products’ (n = 129). Based on this, we considered that the ‘vegetables, tea and coffee, rice, pulses, fruit, and dairy products’ combination represented a food group combination pattern and labeled it with the generic meal code of 1101. After categorizing breakfasts, which included combinations of ‘vegetables and tea and coffee’ (meal codes 1101-1112), we identified the next most commonly consumed food group combination (‘bread and dairy products’) and categorized it similarly (meal codes 1201-1204). We then repeated this process stepwise until arriving at the point at which the next most commonly consumed food group combination represented <2% of the total number of breakfasts (in this case, ‘dairy products and tea and coffee’; meal code 1601). We then identified breakfasts, which consisted of not only a single food group, but which also accounted for >2% of the total number of breakfasts, and identified these as one category (in this case, ‘tea and coffee’; meal code 1701). We repeated this process stepwise for the other meal types. Finally, we established 76 generic meals accounting for all meal types, after excluding ‘all other combinations’ for each meal. Each meal was then assigned a unique generic meal code.

## Section 1. Answers in the FCQ (an example: rice as a staple food in breakfast)

| Staple food | Accompanying food |           |           |        |       |        |        |
|-------------|-------------------|-----------|-----------|--------|-------|--------|--------|
| RIC         | EGG               | FSH       | TVG       | PLN    | FRT   | DRP    | NNB    |
| 5 d/wk      | Sometimes         | Sometimes | Sometimes | Always | Never | Always | Always |

## Section 2. Food combination database characterized by possible answers for accompanying foods (only shown for meal codes including rice as a staple food in breakfast)

| Meal code | RIC    | EGG       | FSH       | TVG    | PLN       | FRT       | DRP       | NNB    |
|-----------|--------|-----------|-----------|--------|-----------|-----------|-----------|--------|
| 1101      | Always | Sometimes | Sometimes | Always | Always    | Always    | Always    | Always |
| 1102      | Always | Sometimes | Sometimes | Always | Always    | Always    | Never     | Always |
| 1103      | Always | Always    | Sometimes | Always | Always    | Never     | Sometimes | Always |
| 1104      | Always | Never     | Always    | Always | Always    | Never     | Sometimes | Always |
| 1105      | Always | Never     | Never     | Always | Always    | Never     | Sometimes | Always |
| 1106      | Always | Always    | Sometimes | Always | Never     | Sometimes | Sometimes | Always |
| 1107      | Always | Never     | Always    | Always | Never     | Sometimes | Sometimes | Always |
| 1108      | Always | Never     | Never     | Always | Never     | Sometimes | Sometimes | Always |
| 1301      | Always | Sometimes | Sometimes | Always | Sometimes | Sometimes | Always    | Never  |
| 1302      | Always | Sometimes | Sometimes | Always | Sometimes | Sometimes | Never     | Never  |
| 1401      | Always | Sometimes | Sometimes | Never  | Sometimes | Sometimes | Sometimes | Always |

## Section 3. Coding rule for each answer against food combination database

|        |           | Food combination database |           |       |
|--------|-----------|---------------------------|-----------|-------|
|        |           | Always                    | Sometimes | Never |
| Answer | Always    | 1                         | 2         | 3     |
|        | Sometimes | 7                         | 8         | 9     |
|        | Never     | 6                         | 5         | 4     |

## Section 4. Determination of food combination (an example: rice as a staple food in breakfast)

| Meal code | Code based on answer |     |     |     |     |     |     | A                                | B                                     | C                          | D                               | Frequency (per d)                              |
|-----------|----------------------|-----|-----|-----|-----|-----|-----|----------------------------------|---------------------------------------|----------------------------|---------------------------------|------------------------------------------------|
|           | EGG                  | FSH | TVG | PLN | FRT | DRP | NNB | Exact match (n of codes 1, 4, 8) | Partial match (n of codes 2, 5, 7, 9) | No match (n of codes 3, 6) | Coefficient (A × 2 + B - C × 2) | Frequency of staple food (5/7 here) × D ÷ Σ(D) |
| 1101      | 8                    | 8   | 7   | 1   | 6   | 1   | 1   | 5                                | 1                                     | 1                          | 9                               | 0.0794                                         |
| 1102      | 8                    | 8   | 7   | 1   | 6   | 3   | 1   | 4                                | 1                                     | 2                          | 5                               | 0.0441                                         |
| 1103      | 7                    | 8   | 7   | 1   | 4   | 2   | 1   | 4                                | 3                                     | 0                          | 11                              | 0.0970                                         |
| 1104      | 9                    | 7   | 7   | 1   | 4   | 2   | 1   | 3                                | 4                                     | 0                          | 10                              | 0.0882                                         |
| 1105      | 9                    | 9   | 7   | 1   | 4   | 2   | 1   | 3                                | 4                                     | 0                          | 10                              | 0.0882                                         |
| 1106      | 7                    | 8   | 7   | 3   | 5   | 2   | 1   | 2                                | 4                                     | 1                          | 6                               | 0.0529                                         |
| 1107      | 9                    | 7   | 7   | 3   | 5   | 2   | 1   | 1                                | 5                                     | 1                          | 5                               | 0.0441                                         |
| 1108      | 9                    | 9   | 7   | 3   | 5   | 2   | 1   | 1                                | 5                                     | 1                          | 5                               | 0.0441                                         |
| 1301      | 8                    | 8   | 7   | 2   | 5   | 1   | 3   | 3                                | 3                                     | 1                          | 7                               | 0.0617                                         |
| 1302      | 8                    | 8   | 7   | 2   | 5   | 3   | 3   | 2                                | 3                                     | 2                          | 3                               | 0.0265                                         |
| 1401      | 8                    | 8   | 9   | 2   | 5   | 2   | 1   | 3                                | 4                                     | 0                          | 10                              | 0.0882                                         |

Figure S4: An example of the calculation of daily consumption frequency of food combinations (meal codes), based on an ad hoc computer algorithm for determining food combinations each participant consumed, using information collected from the food combination questionnaire (FCQ). First, based on the possible answers for accompanying foods ('always', 'sometimes', and 'never') in the FCQ (an example in Section 1), each of the food combinations (meal codes) was characterized in the same manner (Section 2). In this characterization, foods labeled as 'always' were those always included in the meal code (shown in bold in Supplemental Table 1), foods labeled as 'never' were those not included (always excluded) in the meal code (shown in shadow in Supplemental

Table 1), and foods labeled as 'sometimes' were all other foods. All the answers were then coded based on the coding rule (Section 3). A coefficient value was then calculated for each meal code (an example in Section 4); if the coefficient value was negative, a value of zero was assigned. Finally, the consumption frequency for each meal code was calculated based on the consumption frequency of the staple food weighted by the coefficient value as a proportion of the sum of coefficient values with the same staple food in each meal. DRP, dairy products; EGG, eggs; FRT, fruit; FSH, fish (including shellfish); NNB, tea and coffee (i.e., nonalcoholic and noncaloric beverages); PLN, pulses (including nuts); RIC, rice; TVG, total vegetables.

## Section 1. Answers in the FCQ (an example: rice as a staple food in breakfast)

| Staple food | Accompanying food |           |           |        |       |        |        |
|-------------|-------------------|-----------|-----------|--------|-------|--------|--------|
| RIC         | EGG               | FSH       | TVG       | PLN    | FRT   | DRP    | NNB    |
| 5 d/wk      | Sometimes         | Sometimes | Sometimes | Always | Never | Always | Always |

## Section 2. Calculation of consumption frequency of accompanying foods (an example: rice as a staple food in breakfast)

|                                                               |                                              | EGG  | FSH  | TVG  | PLN  | FRT | DRP  | NNB  |
|---------------------------------------------------------------|----------------------------------------------|------|------|------|------|-----|------|------|
| Factor based on the answer for relative consumption frequency | Always =1, sometimes = 0.5, never = 0        | 0.5  | 0.5  | 0.5  | 1    | 0   | 1    | 1    |
| Frequency (per d)                                             | Frequency of staple food (5/7 here) × factor | 0.36 | 0.36 | 0.36 | 0.71 | 0   | 0.71 | 0.71 |

Figure S5: An example of the calculation of daily consumption frequency of accompanying foods, using the information collected from the food combination questionnaire (FCQ). For each staple food for each meal, the daily consumption frequency of accompanying foods was calculated as the daily consumption frequency of the corresponding staple food multiplied by a factor determined based on the answer for relative consumption frequency. DRP, dairy products; EGG, eggs; FRT, fruit; FSH, fish (including shellfish); NNB, tea and coffee (i.e., nonalcoholic and noncaloric beverages); PLN, pulses (including nuts); RIC, rice; TVG, total vegetables.

Table S1: Food combination database used in this study<sup>a</sup>.

| Meal code | Energy (kcal) | Meal composition (g of wet weight) <sup>b</sup> |     |     |     |     |                  |     |     |     |     |     |     |     |                  |     |     |     |     |     |                  |
|-----------|---------------|-------------------------------------------------|-----|-----|-----|-----|------------------|-----|-----|-----|-----|-----|-----|-----|------------------|-----|-----|-----|-----|-----|------------------|
|           |               | RIC                                             | BRD | NDL | OGR | PTT | SGR <sup>c</sup> | PLN | TVG | FRT | FSH | MET | EGG | DRP | FOL <sup>c</sup> | CON | FVJ | ALB | SDK | NNB | SSN <sup>c</sup> |
| Breakfast |               |                                                 |     |     |     |     |                  |     |     |     |     |     |     |     |                  |     |     |     |     |     |                  |
| 1101      | 650           | 127                                             | 3   | 2   | 3   | 10  | 3                | 55  | 91  | 88  | 17  | 4   | 16  | 181 | 2                | 2   | 0   | 1   | 1   | 220 | 73               |
| 1102      | 578           | 146                                             | 0   | 1   | 2   | 19  | 2                | 56  | 125 | 87  | 24  | 5   | 12  | 0   | 2                | 2   | 1   | 1   | 15  | 205 | 122              |
| 1103      | 581           | 161                                             | 1   | 0   | 5   | 7   | 1                | 47  | 86  | 1   | 11  | 6   | 47  | 42  | 2                | 1   | 0   | 0   | 1   | 225 | 88               |
| 1104      | 545           | 154                                             | 0   | 0   | 2   | 10  | 1                | 61  | 96  | 1   | 44  | 2   | 0   | 49  | 1                | 1   | 0   | 0   | 1   | 210 | 91               |
| 1105      | 491           | 153                                             | 0   | 1   | 5   | 8   | 1                | 55  | 85  | 1   | 4   | 6   | 1   | 48  | 1                | 1   | 0   | 0   | 2   | 225 | 79               |
| 1106      | 579           | 147                                             | 2   | 3   | 11  | 9   | 3                | 2   | 103 | 22  | 14  | 10  | 49  | 57  | 4                | 1   | 2   | 0   | 2   | 235 | 71               |
| 1107      | 536           | 154                                             | 1   | 5   | 7   | 10  | 2                | 3   | 99  | 20  | 48  | 6   | 1   | 48  | 2                | 1   | 1   | 0   | 3   | 235 | 65               |
| 1108      | 492           | 145                                             | 3   | 4   | 8   | 16  | 1                | 3   | 99  | 36  | 2   | 14  | 1   | 62  | 2                | 2   | 2   | 0   | 3   | 229 | 68               |
| 1109      | 550           | 0                                               | 70  | 0   | 1   | 3   | 6                | 6   | 77  | 42  | 4   | 9   | 45  | 127 | 7                | 1   | 18  | 0   | 1   | 175 | 17               |
| 1110      | 456           | 0                                               | 67  | 0   | 1   | 3   | 5                | 5   | 84  | 53  | 3   | 12  | 0   | 133 | 4                | 2   | 4   | 0   | 0   | 186 | 14               |
| 1111      | 404           | 0                                               | 70  | 0   | 0   | 3   | 4                | 4   | 75  | 29  | 4   | 8   | 24  | 3   | 6                | 3   | 8   | 0   | 1   | 186 | 24               |
| 1112      | 474           | 1                                               | 0   | 16  | 49  | 10  | 5                | 20  | 105 | 44  | 9   | 7   | 19  | 87  | 3                | 11  | 6   | 0   | 6   | 228 | 38               |
| 1201      | 446           | 0                                               | 74  | 0   | 0   | 1   | 4                | 2   | 2   | 109 | 1   | 2   | 10  | 127 | 4                | 3   | 2   | 0   | 9   | 205 | 10               |
| 1202      | 373           | 3                                               | 71  | 0   | 0   | 1   | 6                | 1   | 1   | 0   | 2   | 2   | 12  | 93  | 4                | 2   | 0   | 0   | 3   | 217 | 5                |
| 1203      | 558           | 4                                               | 76  | 0   | 1   | 0   | 3                | 5   | 65  | 43  | 3   | 11  | 28  | 184 | 4                | 0   | 9   | 0   | 35  | 0   | 14               |
| 1204      | 452           | 1                                               | 72  | 0   | 1   | 0   | 4                | 5   | 1   | 42  | 1   | 7   | 9   | 190 | 5                | 0   | 3   | 0   | 30  | 0   | 4                |
| 1301      | 581           | 137                                             | 0   | 2   | 2   | 9   | 2                | 20  | 104 | 39  | 20  | 7   | 23  | 164 | 2                | 1   | 1   | 1   | 6   | 0   | 68               |
| 1302      | 495           | 156                                             | 2   | 2   | 3   | 7   | 1                | 24  | 98  | 26  | 20  | 8   | 14  | 0   | 2                | 1   | 2   | 0   | 12  | 0   | 85               |
| 1401      | 428           | 143                                             | 1   | 2   | 4   | 7   | 2                | 18  | 5   | 27  | 9   | 5   | 21  | 40  | 1                | 0   | 2   | 0   | 2   | 227 | 49               |
| 1501      | 337           | 0                                               | 72  | 0   | 0   | 1   | 4                | 2   | 2   | 24  | 0   | 7   | 14  | 2   | 5                | 1   | 1   | 0   | 3   | 232 | 6                |
| 1601      | 327           | 0                                               | 0   | 0   | 5   | 2   | 10               | 1   | 0   | 38  | 0   | 4   | 4   | 139 | 2                | 28  | 1   | 0   | 7   | 304 | 1                |
| 1701      | 27            | 0                                               | 0   | 0   | 0   | 0   | 3                | 0   | 0   | 0   | 0   | 0   | 0   | 1   | 0                | 0   | 0   | 0   | 0   | 282 | 0                |
| Lunch     |               |                                                 |     |     |     |     |                  |     |     |     |     |     |     |     |                  |     |     |     |     |     |                  |
| 2101      | 845           | 210                                             | 1   | 7   | 11  | 10  | 3                | 10  | 84  | 20  | 48  | 45  | 44  | 6   | 10               | 2   | 1   | 6   | 3   | 249 | 45               |
| 2102      | 737           | 192                                             | 1   | 11  | 7   | 13  | 2                | 12  | 97  | 25  | 52  | 43  | 2   | 8   | 6                | 3   | 1   | 12  | 4   | 229 | 47               |
| 2103      | 671           | 183                                             | 0   | 6   | 10  | 7   | 3                | 9   | 90  | 17  | 60  | 2   | 42  | 14  | 5                | 2   | 2   | 5   | 2   | 221 | 53               |
| 2104      | 649           | 171                                             | 0   | 6   | 6   | 15  | 3                | 56  | 102 | 23  | 69  | 2   | 2   | 6   | 3                | 3   | 1   | 20  | 0   | 212 | 69               |
| 2105      | 608           | 178                                             | 0   | 14  | 7   | 10  | 2                | 1   | 101 | 23  | 69  | 2   | 2   | 8   | 4                | 2   | 1   | 17  | 1   | 211 | 52               |
| 2106      | 733           | 183                                             | 2   | 13  | 10  | 11  | 2                | 12  | 93  | 17  | 2   | 49  | 46  | 8   | 7                | 3   | 2   | 1   | 1   | 233 | 55               |
| 2107      | 717           | 180                                             | 0   | 11  | 7   | 51  | 3                | 14  | 112 | 16  | 1   | 58  | 1   | 8   | 6                | 3   | 1   | 1   | 2   | 216 | 73               |
| 2108      | 665           | 170                                             | 0   | 24  | 8   | 1   | 2                | 16  | 118 | 26  | 1   | 54  | 2   | 8   | 7                | 3   | 0   | 3   | 1   | 233 | 67               |

Table S1 (continued)

| Meal code | Energy (kcal) | Meal composition (g of wet weight) <sup>b</sup> |     |     |     |     |                  |     |     |     |     |     |     |     |                  |     |     |     |     |     |                  |
|-----------|---------------|-------------------------------------------------|-----|-----|-----|-----|------------------|-----|-----|-----|-----|-----|-----|-----|------------------|-----|-----|-----|-----|-----|------------------|
|           |               | RIC                                             | BRD | NDL | OGR | PTT | SGR <sup>c</sup> | PLN | TVG | FRT | FSH | MET | EGG | DRP | FOL <sup>c</sup> | CON | FVJ | ALB | SDK | NNB | SSN <sup>c</sup> |
| 2109      | 548           | 157                                             | 0   | 16  | 6   | 5   | 3                | 68  | 106 | 28  | 3   | 2   | 15  | 6   | 2                | 0   | 1   | 1   | 1   | 193 | 76               |
| 2110      | 503           | 157                                             | 3   | 31  | 4   | 13  | 2                | 2   | 105 | 19  | 2   | 3   | 14  | 12  | 3                | 3   | 3   | 1   | 2   | 218 | 43               |
| 2111      | 840           | 200                                             | 0   | 16  | 8   | 12  | 2                | 12  | 113 | 13  | 55  | 47  | 20  | 7   | 7                | 1   | 4   | 44  | 4   | 0   | 74               |
| 2112      | 755           | 181                                             | 1   | 26  | 8   | 20  | 2                | 17  | 111 | 19  | 2   | 54  | 13  | 19  | 7                | 4   | 3   | 15  | 9   | 0   | 72               |
| 2113      | 634           | 166                                             | 1   | 13  | 6   | 13  | 2                | 28  | 104 | 26  | 60  | 2   | 14  | 23  | 4                | 1   | 2   | 20  | 11  | 0   | 74               |
| 2114      | 493           | 143                                             | 1   | 26  | 5   | 14  | 2                | 15  | 104 | 19  | 2   | 3   | 20  | 11  | 4                | 1   | 0   | 11  | 11  | 0   | 63               |
| 2201      | 638           | 0                                               | 3   | 193 | 4   | 5   | 1                | 5   | 109 | 31  | 7   | 42  | 12  | 18  | 6                | 4   | 1   | 6   | 3   | 228 | 80               |
| 2202      | 556           | 0                                               | 2   | 217 | 4   | 10  | 2                | 15  | 92  | 23  | 22  | 2   | 12  | 4   | 4                | 0   | 0   | 5   | 1   | 204 | 89               |
| 2203      | 531           | 49                                              | 0   | 194 | 5   | 1   | 2                | 6   | 6   | 10  | 13  | 9   | 10  | 12  | 2                | 2   | 0   | 2   | 2   | 221 | 77               |
| 2301      | 727           | 0                                               | 39  | 73  | 24  | 23  | 3                | 5   | 88  | 24  | 10  | 52  | 12  | 54  | 8                | 9   | 5   | 33  | 30  | 80  | 66               |
| 2401      | 557           | 184                                             | 1   | 0   | 5   | 6   | 2                | 16  | 6   | 28  | 31  | 15  | 17  | 7   | 3                | 4   | 2   | 0   | 1   | 258 | 29               |
| 2501      | 639           | 1                                               | 83  | 4   | 2   | 4   | 13               | 13  | 42  | 50  | 4   | 7   | 14  | 208 | 7                | 6   | 7   | 0   | 9   | 81  | 11               |
| Dinner    |               |                                                 |     |     |     |     |                  |     |     |     |     |     |     |     |                  |     |     |     |     |     |                  |
| 3101      | 952           | 163                                             | 1   | 4   | 10  | 28  | 4                | 81  | 164 | 33  | 81  | 54  | 14  | 5   | 7                | 1   | 1   | 108 | 1   | 216 | 104              |
| 3102      | 815           | 160                                             | 0   | 3   | 5   | 13  | 5                | 74  | 151 | 95  | 97  | 1   | 6   | 17  | 3                | 3   | 0   | 73  | 0   | 221 | 79               |
| 3103      | 780           | 160                                             | 0   | 9   | 4   | 16  | 4                | 84  | 156 | 1   | 91  | 1   | 7   | 8   | 4                | 4   | 1   | 83  | 1   | 195 | 97               |
| 3104      | 933           | 163                                             | 1   | 4   | 7   | 79  | 4                | 1   | 172 | 40  | 71  | 67  | 7   | 10  | 7                | 4   | 0   | 102 | 1   | 222 | 77               |
| 3105      | 858           | 154                                             | 1   | 14  | 11  | 1   | 2                | 1   | 141 | 32  | 74  | 71  | 12  | 9   | 7                | 5   | 2   | 83  | 4   | 225 | 60               |
| 3106      | 686           | 146                                             | 0   | 5   | 6   | 25  | 3                | 3   | 159 | 103 | 94  | 1   | 8   | 13  | 4                | 3   | 0   | 17  | 0   | 238 | 57               |
| 3107      | 735           | 176                                             | 1   | 8   | 7   | 13  | 3                | 2   | 140 | 1   | 100 | 1   | 13  | 10  | 4                | 5   | 1   | 84  | 2   | 227 | 66               |
| 3108      | 839           | 161                                             | 2   | 11  | 6   | 69  | 4                | 29  | 158 | 37  | 2   | 74  | 9   | 14  | 7                | 4   | 2   | 35  | 0   | 215 | 73               |
| 3109      | 819           | 156                                             | 0   | 4   | 10  | 1   | 3                | 79  | 168 | 21  | 2   | 82  | 10  | 8   | 7                | 2   | 1   | 44  | 3   | 228 | 83               |
| 3110      | 801           | 164                                             | 1   | 15  | 14  | 1   | 1                | 2   | 168 | 26  | 2   | 87  | 9   | 16  | 7                | 4   | 1   | 49  | 0   | 234 | 49               |
| 3111      | 556           | 149                                             | 0   | 16  | 7   | 24  | 2                | 33  | 153 | 22  | 3   | 4   | 13  | 14  | 5                | 2   | 2   | 29  | 1   | 196 | 59               |
| 3112      | 1131          | 161                                             | 0   | 11  | 9   | 28  | 3                | 30  | 164 | 22  | 89  | 64  | 10  | 15  | 7                | 3   | 3   | 433 | 9   | 0   | 84               |
| 3113      | 955           | 156                                             | 0   | 8   | 9   | 20  | 4                | 30  | 152 | 39  | 106 | 1   | 11  | 14  | 6                | 4   | 3   | 397 | 2   | 0   | 78               |
| 3114      | 726           | 156                                             | 0   | 5   | 8   | 26  | 3                | 69  | 128 | 18  | 75  | 15  | 9   | 26  | 5                | 1   | 1   | 1   | 3   | 0   | 85               |
| 3115      | 709           | 167                                             | 0   | 15  | 7   | 24  | 3                | 2   | 143 | 26  | 71  | 24  | 10  | 21  | 5                | 1   | 5   | 1   | 3   | 0   | 74               |
| 3116      | 887           | 169                                             | 0   | 6   | 5   | 63  | 2                | 14  | 161 | 15  | 2   | 77  | 9   | 22  | 7                | 4   | 4   | 137 | 4   | 0   | 77               |
| 3117      | 914           | 158                                             | 0   | 8   | 10  | 2   | 2                | 23  | 166 | 27  | 1   | 91  | 9   | 23  | 8                | 3   | 3   | 216 | 12  | 0   | 69               |
| 3118      | 567           | 135                                             | 5   | 16  | 8   | 24  | 2                | 50  | 156 | 25  | 2   | 3   | 11  | 23  | 3                | 0   | 3   | 69  | 0   | 0   | 74               |
| 3201      | 1007          | 0                                               | 4   | 51  | 20  | 28  | 3                | 26  | 162 | 23  | 90  | 71  | 12  | 18  | 7                | 1   | 0   | 474 | 9   | 72  | 92               |



Table S1 (continued)

| Meal code | Energy (kcal) | Meal composition (g of wet weight) <sup>b</sup> |          |          |          |          |                  |          |            |            |           |            |          |            |                  |           |          |            |            |            |                  |
|-----------|---------------|-------------------------------------------------|----------|----------|----------|----------|------------------|----------|------------|------------|-----------|------------|----------|------------|------------------|-----------|----------|------------|------------|------------|------------------|
|           |               | RIC                                             | BRD      | NDL      | OGR      | PTT      | SGR <sup>c</sup> | PLN      | TVG        | FRT        | FSH       | MET        | EGG      | DRP        | FOL <sup>c</sup> | CON       | FVJ      | ALB        | SDK        | NNB        | SSN <sup>c</sup> |
| 3202      | 1127          | <b>0</b>                                        | 8        | 73       | 28       | 32       | 2                | 28       | <b>185</b> | 28         | <b>1</b>  | <b>113</b> | 9        | 18         | 11               | 7         | 1        | <b>496</b> | 4          | 58         | 59               |
| 3203      | 650           | <b>0</b>                                        | 6        | 102      | 24       | 22       | 2                | 26       | <b>154</b> | 28         | 21        | <b>56</b>  | 8        | 23         | 6                | 5         | 9        | <b>1</b>   | 17         | 141        | 76               |
| 3301      | 719           | <b>0</b>                                        | 3        | 83       | 22       | 19       | 2                | 31       | <b>137</b> | 24         | <b>90</b> | <b>2</b>   | 10       | 18         | 5                | 4         | 1        | 233        | 2          | 95         | 70               |
| 3401      | 678           | <b>168</b>                                      | 0        | 30       | 3        | 13       | 2                | 31       | <b>6</b>   | 20         | 60        | 31         | 10       | 7          | 2                | 3         | 3        | 51         | 5          | <b>212</b> | 50               |
| Snacks    |               |                                                 |          |          |          |          |                  |          |            |            |           |            |          |            |                  |           |          |            |            |            |                  |
| 4101      | 464           | 2                                               | 3        | 1        | 3        | 3        | 5                | 4        | 4          | 29         | 1         | 1          | 1        | <b>133</b> | 0                | <b>72</b> | 3        | 19         | 29         | <b>397</b> | 2                |
| 4102      | 375           | 2                                               | 3        | 1        | 2        | 2        | 3                | 5        | 9          | <b>111</b> | 1         | 0          | 0        | <b>1</b>   | 1                | <b>69</b> | 4        | 18         | 19         | <b>379</b> | 2                |
| 4103      | 284           | 0                                               | 1        | 1        | 1        | 1        | 1                | 3        | 2          | <b>0</b>   | 1         | 1          | 0        | <b>1</b>   | 0                | <b>67</b> | 3        | 30         | 30         | <b>375</b> | 1                |
| 4201      | 271           | 1                                               | 4        | 1        | 4        | 3        | 8                | 3        | 8          | 32         | 1         | 1          | 1        | <b>130</b> | 1                | <b>2</b>  | 7        | 27         | 33         | <b>353</b> | 2                |
| 4301      | 171           | 2                                               | 3        | 1        | 4        | 2        | 3                | 7        | 10         | <b>120</b> | 1         | 1          | 1        | <b>1</b>   | 0                | <b>2</b>  | 7        | 14         | 14         | <b>341</b> | 2                |
| 4401      | 177           | 4                                               | 3        | 2        | <b>0</b> | 1        | 2                | 1        | 3          | <b>0</b>   | 2         | 1          | 0        | <b>1</b>   | 0                | <b>2</b>  | 5        | 50         | <b>202</b> | <b>368</b> | 4                |
| 4501      | 422           | 1                                               | 3        | <b>0</b> | 0        | 2        | 1                | 5        | 1          | 26         | <b>0</b>  | 0          | 1        | <b>168</b> | 0                | <b>68</b> | 6        | 5          | 31         | <b>0</b>   | 0                |
| 4601      | 389           | 1                                               | 1        | 4        | 2        | 1        | 2                | 4        | 7          | <b>0</b>   | 5         | 3          | <b>0</b> | <b>1</b>   | 1                | <b>1</b>  | <b>0</b> | <b>506</b> | <b>0</b>   | <b>416</b> | 6                |
| 4701      | 33            | <b>0</b>                                        | <b>0</b> | <b>0</b> | <b>0</b> | <b>0</b> | 2                | <b>0</b> | <b>0</b>   | <b>0</b>   | <b>0</b>  | <b>0</b>   | <b>0</b> | <b>2</b>   | 0                | <b>1</b>  | <b>0</b> | <b>0</b>   | <b>0</b>   | <b>385</b> | 0                |
| 4702      | 209           | <b>0</b>                                        | <b>0</b> | <b>0</b> | <b>0</b> | <b>0</b> | 0                | <b>0</b> | <b>0</b>   | <b>0</b>   | <b>0</b>  | <b>0</b>   | <b>0</b> | <b>0</b>   | 0                | <b>63</b> | <b>0</b> | <b>0</b>   | <b>0</b>   | <b>0</b>   | 0                |
| 4703      | 123           | <b>0</b>                                        | <b>0</b> | <b>0</b> | <b>0</b> | <b>0</b> | 0                | <b>0</b> | <b>0</b>   | <b>0</b>   | <b>0</b>  | <b>0</b>   | <b>0</b> | <b>0</b>   | 0                | <b>1</b>  | <b>0</b> | <b>0</b>   | <b>265</b> | <b>0</b>   | 0                |

<sup>a</sup> The food combination database (meal coding system) was developed according to the 'frequent item sets' data-mining method, using 16-day weighed dietary record data collected from 242 Japanese adults aged 31-81 years, which included 3788 breakfasts, 3823 lunches, 3856 dinners, and 3267 snacks. <sup>b</sup> Abbreviations for food groups are as follows: RIC, rice; BRD, bread; NDL, noodles; OGR, other grains; PTT, potatoes; SGR, sugars; PLN, pulses (including nuts); TVG, total vegetables; FRT, fruit; FSH, fish (including shellfish), MET, meat; EGG, eggs; DRP, dairy products; FOL, fats and oils; CON, confectioneries; FVJ, fruit and vegetable juice; ALB, alcoholic beverages; SDK, soft drinks; NNB, tea and coffee (i.e., nonalcoholic and noncaloric beverages); SSN, seasonings. Food groups which were always included in the meal code are shown in bold while food groups not included (always excluded) in the meal code are shown in shadow. <sup>c</sup> Not considered in development of the meal coding system.

Table S2: Comparison of overall diet quality scores and overall dietary intakes assessed by FCQ and those assessed by BDHQ in 2233 Japanese adults aged 19-80 years<sup>a</sup>.

|                                            | FCQ   |      | BDHQ  |      | Spearman correlation between FCQ and BDHQ |                   |                    |
|--------------------------------------------|-------|------|-------|------|-------------------------------------------|-------------------|--------------------|
|                                            | Mean  | SD   | Mean  | SD   | Total                                     | Men <sup>b</sup>  | Women <sup>c</sup> |
| HEI-2015 <sup>d</sup>                      | 53.3  | 2.7  | 56.4  | 6.6  | 0.49                                      | 0.50              | 0.45               |
| Total fruits <sup>e</sup>                  | 1.6   | 0.5  | 2.3   | 1.6  | 0.55                                      | 0.52              | 0.53               |
| Whole fruits <sup>e</sup>                  | 3.1   | 1.0  | 3.0   | 1.8  | 0.56                                      | 0.55              | 0.52               |
| Total vegetables <sup>e</sup>              | 4.7   | 0.6  | 4.6   | 0.8  | 0.37                                      | 0.40              | 0.32               |
| Greens and beans <sup>e</sup>              | 3.7   | 0.9  | 3.7   | 1.5  | 0.34                                      | 0.37              | 0.30               |
| Whole grains <sup>f</sup>                  | 0.9   | 0.2  | 0.6   | 0.7  | 0.21                                      | 0.22              | 0.16               |
| Dairy <sup>f</sup>                         | 2.2   | 1.0  | 2.2   | 1.6  | 0.60                                      | 0.63              | 0.55               |
| Total protein foods <sup>e</sup>           | 4.6   | 0.4  | 4.9   | 0.3  | 0.19                                      | 0.21              | 0.18               |
| Seafood and plant proteins <sup>e</sup>    | 5.0   | 0.2  | 4.9   | 0.4  | 0.18                                      | 0.22              | 0.12               |
| Fatty acids <sup>f</sup>                   | 7.7   | 1.5  | 8.2   | 2.1  | 0.32                                      | 0.33              | 0.27               |
| Refined grains <sup>f</sup>                | 0.1   | 0.4  | 2.2   | 2.8  | 0.34                                      | 0.34              | 0.34               |
| Sodium <sup>f</sup>                        | 0.0   | 0.0  | 0.5   | 1.3  | 0.04                                      | 0.06              | 0.02               |
| Added sugars <sup>f</sup>                  | 9.9   | 0.2  | 9.7   | 0.9  | 0.30                                      | 0.34              | 0.27               |
| Saturated fats <sup>f</sup>                | 9.8   | 0.5  | 9.5   | 1.1  | 0.30                                      | 0.27              | 0.30               |
| NRF9,3 <sup>g</sup>                        | 709   | 56   | 718   | 97   | 0.48                                      | 0.52              | 0.54               |
| Protein <sup>h</sup>                       | 100   | 0    | 100   | 1    | 0.24                                      | ---               | 0.38               |
| Dietary fiber <sup>h</sup>                 | 81    | 11   | 77    | 17   | 0.36                                      | 0.39              | 0.38               |
| Vitamin A <sup>h</sup>                     | 80    | 12   | 87    | 18   | 0.21                                      | 0.20              | 0.23               |
| Vitamin C <sup>h</sup>                     | 94    | 10   | 94    | 14   | 0.26                                      | 0.25              | 0.31               |
| Vitamin D <sup>h</sup>                     | 96    | 9    | 99    | 7    | 0.16                                      | 0.23              | 0.16               |
| Calcium <sup>h</sup>                       | 80    | 12   | 86    | 17   | 0.46                                      | 0.50              | 0.46               |
| Iron <sup>h</sup>                          | 93    | 12   | 95    | 12   | 0.79                                      | 0.09 <sup>j</sup> | 0.82               |
| Potassium <sup>h</sup>                     | 93    | 8    | 95    | 10   | 0.30                                      | 0.31              | 0.35               |
| Magnesium <sup>h</sup>                     | 94    | 6    | 92    | 11   | 0.35                                      | 0.40              | 0.34               |
| Added sugars                               | 15    | 17   | 20    | 43   | 0.37                                      | 0.39              | 0.34               |
| Saturated fats                             | 7     | 10   | 12    | 17   | 0.41                                      | 0.38              | 0.39               |
| Sodium                                     | 80    | 21   | 75    | 35   | 0.38                                      | 0.30              | 0.20               |
| Food group (g of wet weight per 1000 kcal) |       |      |       |      |                                           |                   |                    |
| Rice                                       | 186.1 | 51.7 | 147.9 | 65.6 | 0.61                                      | 0.59              | 0.62               |
| Bread                                      | 26.0  | 17.7 | 18.9  | 15.3 | 0.75                                      | 0.76              | 0.73               |
| Noodles                                    | 42.6  | 21.7 | 34.5  | 23.4 | 0.52                                      | 0.51              | 0.52               |
| Other grains                               | 13.9  | 4.8  | NA    | NA   | ---                                       | ---               | ---                |
| Potatoes                                   | 16.1  | 4.2  | 25.9  | 19.5 | 0.14                                      | 0.17              | 0.11               |
| Sugars                                     | 7.2   | 1.7  | 2.9   | 2.3  | 0.07                                      | 0.08              | 0.03               |
| Pulses (including nuts)                    | 24.9  | 6.4  | 38.8  | 25.4 | 0.45                                      | 0.46              | 0.45               |
| Total vegetables                           | 131.9 | 38.5 | 151.5 | 75.4 | 0.45                                      | 0.47              | 0.42               |

Table S2 (continued)

|                                                              | FCQ   |       | BDHQ  |       | Spearman correlation between FCQ and BDHQ |                  |                    |
|--------------------------------------------------------------|-------|-------|-------|-------|-------------------------------------------|------------------|--------------------|
|                                                              | Mean  | SD    | Mean  | SD    | Total                                     | Men <sup>b</sup> | Women <sup>c</sup> |
| Fruit                                                        | 36.1  | 11.6  | 49.4  | 43.2  | 0.58                                      | 0.56             | 0.55               |
| Fish (including shellfish)                                   | 28.0  | 6.7   | 46.0  | 24.3  | 0.31                                      | 0.31             | 0.32               |
| Meat                                                         | 27.7  | 7.2   | 46.4  | 19.2  | 0.30                                      | 0.34             | 0.27               |
| Eggs                                                         | 16.8  | 3.3   | 23.6  | 14.7  | 0.42                                      | 0.41             | 0.42               |
| Dairy products                                               | 59.6  | 29.4  | 60.8  | 52.8  | 0.60                                      | 0.63             | 0.55               |
| Fats and oils                                                | 8.6   | 1.0   | 10.6  | 4.0   | 0.19                                      | 0.19             | 0.19               |
| Confectioneries                                              | 12.5  | 5.3   | 32.9  | 22.7  | 0.53                                      | 0.53             | 0.48               |
| Fruit and vegetable juice                                    | 5.7   | 1.5   | 21.1  | 40.4  | 0.12                                      | 0.14             | 0.10               |
| Alcoholic beverages                                          | 40.0  | 44.9  | 63.9  | 118.7 | 0.82                                      | 0.82             | 0.77               |
| Soft drinks                                                  | 13.4  | 6.6   | 24.4  | 47.8  | 0.36                                      | 0.36             | 0.38               |
| Tea and coffee (i.e., nonalcoholic and noncaloric beverages) | 363.4 | 104.9 | 318.7 | 196.8 | 0.34                                      | 0.38             | 0.28               |
| Seasonings                                                   | 101.6 | 14.8  | 84.3  | 49.4  | 0.22                                      | 0.21             | 0.22               |
| Macronutrient (% of energy)                                  |       |       |       |       |                                           |                  |                    |
| Protein                                                      | 13.2  | 0.8   | 16.0  | 2.9   | 0.42                                      | 0.41             | 0.40               |
| Fat                                                          | 26.0  | 2.2   | 28.1  | 5.5   | 0.42                                      | 0.37             | 0.40               |
| Saturated fats                                               | 7.2   | 1.0   | 7.3   | 1.8   | 0.45                                      | 0.42             | 0.42               |
| Monounsaturated fats                                         | 9.7   | 0.8   | 10.1  | 2.2   | 0.39                                      | 0.36             | 0.38               |
| Polyunsaturated fats                                         | 6.1   | 0.3   | 7.0   | 1.5   | 0.27                                      | 0.22             | 0.31               |
| Carbohydrate                                                 | 57.6  | 3.3   | 50.9  | 7.8   | 0.49                                      | 0.50             | 0.47               |
| Alcohol                                                      | 1.9   | 2.2   | 3.8   | 6.6   | 0.82                                      | 0.84             | 0.77               |
| Energy (kcal/d)                                              | 1655  | 203   | 1840  | 532   | 0.40                                      | 0.45             | 0.46               |

BDHQ, brief diet history questionnaire; FCQ, food combination questionnaire; HEI-2015, Healthy Eating Index-2015; NA, not available; NRF9.3, Nutrient-Rich Food Index 9.3. <sup>a</sup> A higher score indicates a higher diet quality, except for added sugars, saturated fats, and sodium components in NRF9.3, for which a higher score indicates an unfavorable dietary intake (i.e., higher intakes of added sugars, saturated fats, and sodium). <sup>b</sup> Spearman correlations calculated based on men only (n = 1070). <sup>c</sup> Spearman correlations calculated based on women only (n = 1163). <sup>d</sup> Calculated as the sum of all component scores. A maximum score is 100. <sup>e</sup> A maximum score is 5. <sup>f</sup> A maximum score is 10. <sup>g</sup> Calculated as the sum of scores for nine nutrients to encourage (i.e., protein, dietary fiber, vitamins A, C, and D, calcium, iron, potassium, and magnesium) minus the sum of scores for three nutrients to limit (i.e., added sugar, saturated fats, and sodium). A maximum score is 900. <sup>h</sup> A maximum score is 100. <sup>i</sup> Not calculated because all men had a maximum score. <sup>j</sup> Note that almost all men had a maximum score.

Table S3: Correlations among diet quality scores for each meal and overall diet quality scores in 2233 Japanese adults aged 19-80 years<sup>a</sup>.

|              | HEI-2015<br>Breakfast | HEI-2015<br>Lunch | HEI-2015<br>Dinner | HEI-2015<br>Snacks | HEI-2015<br>Overall diet | NRF9.3<br>Breakfast | NRF9.3<br>Lunch | NRF9.3<br>Dinner | NRF9.3<br>Snacks |
|--------------|-----------------------|-------------------|--------------------|--------------------|--------------------------|---------------------|-----------------|------------------|------------------|
| HEI-2015     |                       |                   |                    |                    |                          |                     |                 |                  |                  |
| Lunch        | 0.21                  | 1                 |                    |                    |                          |                     |                 |                  |                  |
| Dinner       | 0.16                  | 0.18              | 1                  |                    |                          |                     |                 |                  |                  |
| Snacks       | 0.17                  | 0.11              | 0.12               | 1                  |                          |                     |                 |                  |                  |
| Overall diet | 0.71                  | 0.49              | 0.52               | 0.29               | 1                        |                     |                 |                  |                  |
| NRF9.3       |                       |                   |                    |                    |                          |                     |                 |                  |                  |
| Breakfast    | 0.82                  | 0.23              | 0.10               | 0.18               | 0.55                     | 1                   |                 |                  |                  |
| Lunch        | 0.20                  | 0.75              | 0.15               | 0.08               | 0.39                     | 0.28                | 1               |                  |                  |
| Dinner       | 0.21                  | 0.36              | 0.17               | 0.14               | 0.48                     | 0.28                | 0.38            | 1                |                  |
| Snacks       | 0.14                  | 0.10              | 0.10               | 0.77               | 0.22                     | 0.19                | 0.20            | 0.16             | 1                |
| Overall diet | 0.50                  | 0.53              | 0.25               | 0.22               | 0.67                     | 0.62                | 0.67            | 0.71             | 0.33             |

HEI-2015, Healthy Eating Index-2015; NRF9.3, Nutrient-Rich Food Index 9.3. <sup>a</sup> Values are Spearman correlation coefficients. A higher score indicates a higher diet quality.

Table S4: Food group intake in snacks in relation to diet quality scores for snacks in 2233 Japanese adults aged 19-80 years<sup>a</sup>.

| Food group                                                         | Intake (g of wet weight per 1000 kcal of energy from snacks) |        |        | r with   | r with |
|--------------------------------------------------------------------|--------------------------------------------------------------|--------|--------|----------|--------|
|                                                                    | Median                                                       | P25    | P75    | HEI-2015 | NRF9.3 |
| Total vegetables                                                   | 32.6                                                         | 26.2   | 36.3   | 0.60     | 0.66   |
| Fruit                                                              | 78.6                                                         | 0      | 97.5   | 0.69     | 0.43   |
| Dairy products                                                     | 114.9                                                        | 0      | 153.7  | 0.17     | 0.22   |
| Confectioneries                                                    | 120.9                                                        | 104.8  | 155.1  | -0.58    | -0.41  |
| Fruit and vegetable juice                                          | 26.4                                                         | 21.5   | 27.2   | 0.60     | 0.50   |
| Soft drinks                                                        | 95.5                                                         | 0      | 134.2  | -0.10    | -0.35  |
| Tea and coffee (i.e.,<br>nonalcoholic and<br>noncaloric beverages) | 1879.9                                                       | 1332.5 | 2254.7 | 0.27     | 0.46   |

HEI-2015, Healthy Eating Index-2015; NRF9.3, Nutrient-Rich Food Index 9.3; P25, 25th percentile; P75, 75th percentile. <sup>a</sup> Spearman correlation coefficients between intakes of food groups in snacks and HEI-2015 and NRF9.3 of snacks were calculated. For both HEI-2015 and NRF9.3, a higher score indicates a higher diet quality. Only data on the food groups whose median value was >25 g/1000 kcal are shown.

Table S5: Food combinations (meal codes) in lunch in relation to diet quality scores for lunch in 2233 Japanese adults aged 19-80 years<sup>a</sup>.

| Meal code | Food group included |                                                    | Intake (% of total energy) |      |      | r with HEI-2015 | r with NRF9.3 |
|-----------|---------------------|----------------------------------------------------|----------------------------|------|------|-----------------|---------------|
|           | Staple food         | Accompanying food <sup>b</sup>                     | Median                     | P25  | P75  |                 |               |
| 2101      | Rice                | Total vegetables, tea and coffee, fish, meat, eggs | 1.96                       | 1.22 | 2.49 | 0.36            | 0.48          |
| 2102      | Rice                | Total vegetables, tea and coffee, fish, meat       | 1.72                       | 1.14 | 2.15 | 0.32            | 0.43          |
| 2103      | Rice                | Total vegetables, tea and coffee, fish, eggs       | 1.47                       | 0.94 | 1.87 | 0.37            | 0.44          |
| 2104      | Rice                | Total vegetables, tea and coffee, fish, pulses     | 1.19                       | 0.73 | 1.60 | 0.46            | 0.46          |
| 2105      | Rice                | Total vegetables, tea and coffee, fish             | 1.21                       | 0.81 | 1.53 | 0.19            | 0.25          |
| 2106      | Rice                | Total vegetables, tea and coffee, meat, eggs       | 1.72                       | 1.16 | 2.17 | 0.18            | 0.31          |
| 2107      | Rice                | Total vegetables, tea and coffee, meat, potatoes   | 1.46                       | 0.95 | 1.84 | 0.23            | 0.34          |
| 2108      | Rice                | Total vegetables, tea and coffee, meat             | 1.48                       | 1.09 | 1.87 | 0.02            | 0.14          |
| 2109      | Rice                | Total vegetables, tea and coffee, pulses           | 1.21                       | 0.81 | 1.53 | 0.25            | 0.28          |
| 2110      | Rice                | Total vegetables, tea and coffee                   | 1.18                       | 0.84 | 1.46 | -0.02           | 0.06          |
| 2111      | Rice                | Total vegetables, meat, fish                       | 1.44                       | 0.89 | 1.86 | 0.35            | 0.43          |
| 2112      | Rice                | Total vegetables, meat                             | 1.34                       | 0.97 | 1.73 | 0.12            | 0.21          |
| 2113      | Rice                | Total vegetables, fish                             | 1.04                       | 0.64 | 1.34 | 0.35            | 0.36          |
| 2114      | Rice                | Total vegetables                                   | 0.84                       | 0.59 | 1.07 | 0.09            | 0.11          |
| 2201      | Noodles             | Tea and coffee, total vegetables, meat             | 1.13                       | 0    | 2.28 | 0.30            | 0.06          |
| 2202      | Noodles             | Tea and coffee, total vegetables                   | 1.43                       | 0    | 2.69 | 0.18            | -0.12         |
| 2203      | Noodles             | Tea and coffee                                     | 1.57                       | 0.43 | 3.25 | -0.28           | -0.41         |
| 2301      | No staple food      | Total vegetables, meat                             | 0                          | 0    | 0    | -0.02           | 0.00          |
| 2401      | Rice                | Tea and coffee                                     | 1.39                       | 1.04 | 1.76 | -0.24           | -0.17         |
| 2501      | Bread               | Dairy products                                     | 0                          | 0    | 5.05 | -0.13           | -0.07         |

HEI-2015, Healthy Eating Index-2015; NRF9.3, Nutrient-Rich Food Index 9.3; P25, 25th percentile; P75, 75th percentile. <sup>a</sup> Spearman correlation coefficients between intakes of meal codes in lunch (as assessed by percentage of total energy intake) and the quality of lunch as assessed by the HEI-2015 and NRF9.3 were calculated. For both HEI-2015 and NRF9.3, a higher score indicates a higher diet quality. <sup>b</sup> 'Tea and coffee' consisting of nonalcoholic and noncaloric beverages; 'fish' including shellfish; 'pulses' including nuts.

Table S6: Food combinations (meal codes) in dinner in relation to diet quality scores for dinner in 2233 Japanese adults aged 19-80 years<sup>a</sup>.

| Meal code | Food group included |                                                        | Intake (% of total energy) |      |      | r with HEI-2015 | r with NRF9.3 |
|-----------|---------------------|--------------------------------------------------------|----------------------------|------|------|-----------------|---------------|
|           | Staple food         | Accompanying food <sup>b</sup>                         | Median                     | P25  | P75  |                 |               |
| 3101      | Rice                | Total vegetables, tea and coffee, fish, pulses, meat   | 2.34                       | 1.55 | 2.84 | -0.57           | 0.37          |
| 3102      | Rice                | Total vegetables, tea and coffee, fish, pulses, fruit  | 1.57                       | 0.93 | 2.06 | -0.31           | 0.47          |
| 3103      | Rice                | Total vegetables, tea and coffee, fish, pulses         | 1.64                       | 1.08 | 2.06 | -0.69           | 0.29          |
| 3104      | Rice                | Total vegetables, tea and coffee, fish, meat, potatoes | 1.91                       | 1.19 | 2.38 | -0.58           | 0.23          |
| 3105      | Rice                | Total vegetables, tea and coffee, fish, meat           | 1.79                       | 1.22 | 2.19 | -0.63           | 0.16          |
| 3106      | Rice                | Total vegetables, tea and coffee, fish, fruit          | 1.23                       | 0.72 | 1.55 | -0.35           | 0.29          |
| 3107      | Rice                | Total vegetables, tea and coffee, fish                 | 1.42                       | 0.87 | 1.82 | -0.76           | 0.09          |
| 3108      | Rice                | Total vegetables, tea and coffee, meat, potatoes       | 1.96                       | 1.28 | 2.37 | -0.62           | 0.27          |
| 3109      | Rice                | Total vegetables, tea and coffee, meat, pulses         | 1.82                       | 1.22 | 2.19 | -0.61           | 0.30          |
| 3110      | Rice                | Total vegetables, tea and coffee, meat                 | 1.62                       | 1.08 | 2.01 | -0.66           | 0.09          |
| 3111      | Rice                | Total vegetables, tea and coffee                       | 1.31                       | 0.88 | 1.63 | -0.64           | 0.22          |
| 3112      | Rice                | Total vegetables, fish, alcoholic beverages, meat      | 1.59                       | 1.10 | 2.25 | -0.51           | 0.28          |
| 3113      | Rice                | Total vegetables, fish, alcoholic beverages            | 1.22                       | 0.74 | 1.74 | -0.47           | 0.28          |
| 3114      | Rice                | Total vegetables, fish, pulses                         | 1.38                       | 0.89 | 1.76 | -0.55           | 0.27          |
| 3115      | Rice                | Total vegetables, fish                                 | 1.23                       | 0.79 | 1.62 | -0.62           | 0.06          |
| 3116      | Rice                | Total vegetables, meat, potatoes                       | 1.48                       | 0.96 | 1.78 | -0.60           | 0.21          |
| 3117      | Rice                | Total vegetables, meat                                 | 1.56                       | 1.08 | 1.89 | -0.66           | 0.12          |
| 3118      | Rice                | Total vegetables                                       | 1.00                       | 0.62 | 1.21 | -0.61           | 0.15          |
| 3201      | No staple food      | Total vegetables, meat, alcoholic beverages, fish      | 0.64                       | 0    | 2.42 | 0.68            | -0.16         |
| 3202      | No staple food      | Total vegetables, meat, alcoholic beverages            | 1.46                       | 0    | 3.93 | 0.66            | -0.23         |
| 3203      | No staple food      | Total vegetables, meat                                 | 2.35                       | 0    | 6.34 | 0.65            | -0.29         |
| 3301      | No staple food      | Total vegetables, fish                                 | 1.08                       | 0    | 3.02 | 0.69            | -0.25         |
| 3401      | Rice                | Tea and coffee                                         | 1.67                       | 1.18 | 1.99 | -0.77           | -0.14         |

HEI-2015, Healthy Eating Index-2015; NRF9.3, Nutrient-Rich Food Index 9.3; P25, 25th percentile; P75, 75th percentile. <sup>a</sup> Spearman correlation coefficients between intakes of meal codes in dinner (as assessed by percentage of total energy intake) and the quality of dinner as assessed by the HEI-2015 and NRF9.3 were calculated. For both HEI-2015 and NRF9.3, a higher score indicates a higher diet quality. <sup>b</sup> 'Tea and coffee' consisting of nonalcoholic and noncaloric beverages; 'fish' including shellfish; 'pulses' including nuts.

Table S7: Food combinations (meal codes) in snacks in relation to diet quality scores for snacks in 2233 Japanese adults aged 19-80 years<sup>a</sup>.

| Meal code | Food group included |                                                 | Intake (% of total energy) |      |      | r with HEI-2015 | r with NRF9.3 |
|-----------|---------------------|-------------------------------------------------|----------------------------|------|------|-----------------|---------------|
|           | Staple food         | Accompanying food <sup>b</sup>                  | Median                     | P25  | P75  |                 |               |
| 4101      | No staple food      | Confectioneries, tea and coffee, dairy products | 1.83                       | 0.98 | 2.57 | 0.04            | 0.00          |
| 4102      | No staple food      | Confectioneries, tea and coffee, fruit          | 1.41                       | 0.75 | 1.90 | 0.13            | 0.02          |
| 4103      | No staple food      | Confectioneries, tea and coffee                 | 1.23                       | 0.76 | 1.61 | -0.22           | -0.16         |
| 4201      | No staple food      | Dairy products, tea and coffee                  | 0.95                       | 0.48 | 1.36 | 0.39            | 0.34          |
| 4301      | No staple food      | Fruit, tea and coffee                           | 0.56                       | 0.31 | 0.79 | 0.57            | 0.43          |
| 4401      | No staple food      | Soft drinks, tea and coffee                     | 0.48                       | 0.26 | 0.69 | 0.06            | 0.04          |
| 4501      | No staple food      | Confectioneries, dairy products                 | 0.93                       | 0.38 | 1.51 | -0.01           | -0.12         |
| 4601      | No staple food      | Alcoholic beverages, tea and coffee             | 0.81                       | 0.35 | 1.28 | 0.28            | 0.48          |
| 4701      | No staple food      | Tea and coffee                                  | 0.12                       | 0.07 | 0.16 | 0.09            | 0.24          |
| 4702      | No staple food      | Confectioneries                                 | 0.51                       | 0.27 | 0.80 | -0.30           | -0.17         |
| 4703      | No staple food      | Soft drinks                                     | 0.16                       | 0.03 | 0.30 | -0.08           | -0.15         |

HEI-2015, Healthy Eating Index-2015; NRF9.3, Nutrient-Rich Food Index 9.3; P25, 25th percentile; P75, 75th percentile. <sup>a</sup> Spearman correlation coefficients between intakes of meal codes in snacks (as assessed by percentage of total energy intake) and the quality of snacks as assessed by the HEI-2015 and NRF9.3 were calculated. For both HEI-2015 and NRF9.3, a higher score indicates a higher diet quality. <sup>b</sup> 'Tea and coffee' consisting of nonalcoholic and noncaloric beverages.
